# Supplementary material for: An Update on the Quality of Medication Treatment for Mental Disorders in the VA
Source: Atypon-hosted journal article supplement (doi:10.1176/appi.ps.670804), 2016-08-01
Supplement: appi.ps.670804.ds001.pdf [file appi.ps.670804.ds001.pdf]

Table 1: Process-based Quality Measure Definitions

| Measure                                            | VA Definition created by Watkins et al. 2007 data                                                                                                                                                               | VA Definition - 2014                                                                                                                                                                                                        | HEDIS Definition - 2014                                                                                                                                                                                              |
|----------------------------------------------------|-----------------------------------------------------------------------------------------------------------------------------------------------------------------------------------------------------------------|-----------------------------------------------------------------------------------------------------------------------------------------------------------------------------------------------------------------------------|----------------------------------------------------------------------------------------------------------------------------------------------------------------------------------------------------------------------|
| Medication laboratory tests                        | Proportion of patients with one or more prescriptions for lithium, valproic acid, carbamazepine, or any antipsychotic medication who received all recommended blood-level monitoring tests during study period. | Proportion of patients with one or more prescriptions for lithium, valproic acid, carbamazepine, or any antipsychotic medication who received all recommended blood-level monitoring tests during study period.             | N/A                                                                                                                                                                                                                  |
| Any laboratory screening tests                     | Proportion of patients with evidence of any of the following laboratory screening tests during the study period: thyroid stimulating hormone, liver function panel, and chemistry panel.                        | Proportion of patients with evidence of any of the following laboratory screening tests during the study period: thyroid stimulating hormone, liver function panel, and chemistry panel.                                    | N/A                                                                                                                                                                                                                  |
| Antidepressants, 12-week supply <sup>a</sup>       | Proportion of patients in the major depressive disorder cohort who filled prescriptions for a 12-week supply of an anti-depressant in the 12 weeks following the start of a new treatment episode.              | Percentage of patients with a depression diagnosis newly treated with antidepressant medication who received at least 84 days (12 weeks) of antidepressant medication through 114 days after index prescription start date. | Percentage of adults 18 years of age or older with a diagnosis of major depression who were newly treated with antidepressant medication and remained on antidepressant medication for at least 84 days (12 weeks).  |
| Maintenance antidepressants, 6 months <sup>a</sup> | Proportion of patients in the major depressive disorder cohort who filled prescriptions for a 180-day supply of an antidepressant in the 180 days following the start of a new treatment episode.               | Percent of patients with depression diagnosis newly treated with antidepressant medication who received at least 180 days (6 months) of antidepressant medication through 231 days after index prescription start date.     | Percentage of adults 18 years of age or older with a diagnosis of major depression who were newly treated with antidepressant medication and remained on antidepressant medication for at least 180 days (6 months). |

a: Data definitions used in Watkins et al. 2016 differ from those used by VA and HEDIS in 2014.

Table 2: Performance on four process-based quality measures for veteran cohort and HMO private-plan cohort

| Measure                               | VA National Average (%), Watkins et al. (1) 2007 data | VA National Average (%), 2014 data | HEDIS (3) National Average Range or Average among Commercial, Medicaid, & Medicare HMOs (%), 2014 data |
|---------------------------------------|-------------------------------------------------------|------------------------------------|--------------------------------------------------------------------------------------------------------|
| Medication laboratory tests           | 77.4                                                  | 78.6                               | N/A                                                                                                    |
| Any laboratory screening tests        | 86.9                                                  | 84.5                               | N/A                                                                                                    |
| Antidepressants, 12-week supply       | 49.0 <sup>a</sup>                                     | 72.0                               | 52.3-68.5                                                                                              |
| Maintenance antidepressants, 6 months | 31.3 <sup>a</sup>                                     | 56.0                               | 37.1-54.7                                                                                              |

a: Data definitions used in Watkins et al. 2016 differ from those used by VA and HEDIS in 2014.
